# Supplementary material
Source: publisher figshare collection journal article supplement (https://geolsoc.figshare.com/articles/dataset/_/3454034)
Supplement: Supplementary file 1 [file 1]

EION CAMERON SPECIAL ISSUE OF GEEA MANUSCRIPT  
BY CARITAT & COOPER (DECEMBER 2014)

**Appendix 3.** Summary statistics for MMI® element content data from the National Geochemical Survey of Australia (parameters in italics deemed not fit for purpose) (Caritat & Cooper 2011b)

| Element Method*<br>Unit LLD^            | Typ<br>e# | N    | N<LL<br>D | %<LL<br>D | Min     | 25%     | Med     | 75%    | Max    |
|-----------------------------------------|-----------|------|-----------|-----------|---------|---------|---------|--------|--------|
| <b>MMI</b>                              |           |      |           |           |         |         |         |        |        |
| <i>Ag MMI-ME mg/kg</i><br><i>0.001</i>  | <b>Tc</b> | 1191 | 121       | 10%       | <0.001  | 0.002   | 0.005   | 0.011  | 0.302  |
| <i>Al MMI-ME mg/kg l</i>                | <b>Tc</b> | 1191 | 34        | 3%        | <1      | 7       | 12      | 26     | 453    |
| <i>As MMI-ME mg/kg</i><br><i>0.01</i>   | <b>Tc</b> | 1191 | 847       | 71%       | <0.01   | <0.01   | <0.01   | 0.01   | 1.98   |
| <i>Au MMI-ME mg/kg</i><br><i>0.0001</i> | <b>Tc</b> | 1191 | 364       | 31%       | <0.0001 | <0.0001 | 0.0002  | 0.0005 | 0.0198 |
| <i>Ba MMI-ME mg/kg</i><br><i>0.01</i>   | <b>Tc</b> | 1191 | 3         | 0%        | <0.01   | 0.395   | 0.87    | 1.74   | 15.3   |
| <i>Bi MMI-ME mg/kg</i><br><i>0.001</i>  | <b>Tc</b> | 1191 | 1142      | 96%       | <0.001  | <0.001  | <0.001  | <0.001 | 0.016  |
| <i>Ca MMI-ME mg/kg</i><br><i>10</i>     | <b>Tc</b> | 1191 | 4         | 0%        | <10     | 220     | 390     | 560    | 3680   |
| <i>Cd MMI-ME mg/kg</i><br><i>0.001</i>  | <b>Tc</b> | 1191 | 120       | 10%       | <0.001  | 0.002   | 0.005   | 0.009  | 1.75   |
| <i>Ce MMI-ME mg/kg</i><br><i>0.005</i>  | <b>Tc</b> | 1191 | 75        | 6%        | <0.005  | 0.019   | 0.101   | 0.429  | 12.1   |
| <i>Co MMI-ME mg/kg</i><br><i>0.005</i>  | <b>Tc</b> | 1191 | 7         | 1%        | <0.005  | 0.086   | 0.178   | 0.328  | 2.58   |
| <i>Cr MMI-ME mg/kg</i><br><i>0.001</i>  | <b>Tc</b> | 1191 | 1         | 0%        | <0.001  | 0.010   | 0.024   | 0.057  | 2.55   |
| <i>Cs MMI-ME mg/kg</i><br><i>0.0005</i> | <b>Tc</b> | 1191 | 2         | 0%        | <0.0005 | 0.0071  | 0.0118  | 0.0229 | 1.83   |
| <i>Cu MMI-ME mg/kg</i><br><i>0.01</i>   | <b>Tc</b> | 1191 | 0         | 0%        | 0.01    | 0.47    | 0.96    | 1.59   | 30.5   |
| <i>Dy MMI-ME mg/kg</i><br><i>0.001</i>  | <b>Tc</b> | 1191 | 18        | 2%        | <0.001  | 0.0085  | 0.023   | 0.079  | 1.49   |
| <i>Er MMI-ME mg/kg</i><br><i>0.0005</i> | <b>Tc</b> | 1191 | 18        | 2%        | <0.0005 | 0.0043  | 0.0112  | 0.0384 | 2.23   |
| <i>Eu MMI-ME mg/kg</i><br><i>0.0005</i> | <b>Tc</b> | 1191 | 63        | 5%        | <0.0005 | 0.0016  | 0.0067  | 0.0205 | 0.359  |
| <i>Fe MMI-ME mg/kg l</i>                | <b>Tc</b> | 1191 | 137       | 12%       | <1      | 2       | 4       | 13     | 555    |
| <i>Ga MMI-ME mg/kg</i><br><i>0.001</i>  | <b>Tc</b> | 1191 | 14        | 1%        | <0.001  | 0.012   | 0.025   | 0.046  | 0.685  |
| <i>Gd MMI-ME mg/kg</i><br><i>0.001</i>  | <b>Tc</b> | 1191 | 19        | 2%        | <0.001  | 0.008   | 0.029   | 0.096  | 1.61   |
| <i>Hg MMI-ME mg/kg</i><br><i>0.001</i>  | <b>Tc</b> | 1191 | 1112      | 93%       | <0.001  | <0.001  | <0.001  | <0.001 | 0.101  |
| <i>K MMI-ME mg/kg</i><br><i>0.1</i>     | <b>Tc</b> | 1191 | 0         | 0%        | 1.2     | 44.9    | 82.2    | 134.0  | 1040   |
| <i>La MMI-ME mg/kg</i><br><i>0.001</i>  | <b>Tc</b> | 1191 | 64        | 5%        | <0.001  | 0.005   | 0.027   | 0.123  | 3.31   |
| <i>Li MMI-ME mg/kg</i><br><i>0.005</i>  | <b>Tc</b> | 1191 | 394       | 33%       | <0.005  | <0.005  | 0.008   | 0.019  | 0.788  |
| <i>Mg MMI-ME mg/kg</i><br><i>1</i>      | <b>Tc</b> | 1191 | 0         | 0%        | 2       | 70      | 140     | 261    | 2920   |
| <i>Mn MMI-ME mg/kg</i><br><i>0.005</i>  | <b>Tc</b> | 1191 | 0         | 0%        | 0.079   | 2.240   | 3.990   | 8.140  | 59.7   |
| <i>Mo MMI-ME mg/kg</i><br><i>0.005</i>  | <b>Tc</b> | 1191 | 454       | 38%       | <0.005  | <0.005  | 0.007   | 0.012  | 0.276  |
| <i>Nb MMI-ME mg/kg</i><br><i>0.0005</i> | <b>Tc</b> | 1191 | 826       | 69%       | <0.0005 | <0.0005 | <0.0005 | 0.0007 | 1.46   |
| <i>Nd MMI-ME mg/kg</i>                  | <b>Tc</b> | 1191 | 17        | 1%        | <0.001  | 0.012   | 0.092   | 0.343  | 6.87   |

EION CAMERON SPECIAL ISSUE OF GEEA MANUSCRIPT  
BY CARITAT & COOPER (DECEMBER 2014)

|                            |           |      |      |     |         |         |         |         |        |
|----------------------------|-----------|------|------|-----|---------|---------|---------|---------|--------|
| <i>0.001</i>               |           |      |      |     |         |         |         |         |        |
| Ni MMI-ME mg/kg<br>0.005   | <b>Tc</b> | 1191 | 0    | 0%  | 0.006   | 0.181   | 0.411   | 0.912   | 16.1   |
| P MMI-ME mg/kg<br>0.1      | <b>Tc</b> | 1191 | 82   | 7%  | <0.1    | 0.6     | 1.2     | 2.5     | 32     |
| Pb MMI-ME mg/kg<br>0.01    | <b>Tc</b> | 1191 | 140  | 12% | <0.01   | 0.02    | 0.04    | 0.11    | 5.89   |
| Pd MMI-ME mg/kg<br>0.001   | <b>Tc</b> | 1191 | 966  | 81% | <0.001  | <0.001  | <0.001  | <0.001  | 0.012  |
| Pr MMI-ME mg/kg<br>0.001   | <b>Tc</b> | 1191 | 153  | 13% | <0.001  | 0.002   | 0.016   | 0.063   | 1.25   |
| Rb MMI-ME mg/kg<br>0.00025 | <b>Tc</b> | 1191 | 0    | 0%  | 0.00300 | 0.07010 | 0.10700 | 0.18150 | 2.63   |
| Sb MMI-ME mg/kg<br>0.001   | <b>Tc</b> | 1191 | 1124 | 94% | <0.001  | <0.001  | <0.001  | <0.001  | 0.025  |
| Sc MMI-ME mg/kg<br>0.005   | <b>Tc</b> | 1191 | 407  | 34% | <0.005  | <0.005  | 0.008   | 0.023   | 6.84   |
| Se MMI-ME mg/kg<br>0.002   | <b>Tc</b> | 1191 | 260  | 22% | <0.002  | 0.002   | 0.007   | 0.015   | 1.28   |
| Sm MMI-ME mg/kg<br>0.001   | <b>Tc</b> | 1191 | 41   | 3%  | <0.001  | 0.004   | 0.025   | 0.083   | 1.34   |
| Sn MMI-ME mg/kg<br>0.001   | <b>Tc</b> | 1191 | 1143 | 96% | <0.001  | <0.001  | <0.001  | <0.001  | 0.075  |
| Sr MMI-ME mg/kg<br>0.01    | <b>Tc</b> | 1191 | 0    | 0%  | 0.05    | 1.34    | 2.40    | 4.82    | 35.6   |
| Ta MMI-ME mg/kg<br>0.001   | <b>Tc</b> | 1191 | 1148 | 96% | <0.001  | <0.001  | <0.001  | <0.001  | 0.07   |
| Tb MMI-ME mg/kg<br>0.001   | <b>Tc</b> | 1191 | 241  | 20% | <0.001  | 0.001   | 0.004   | 0.014   | 0.247  |
| Te MMI-ME mg/kg<br>0.01    | <b>Tc</b> | 1191 | 1185 | 99% | <0.01   | <0.01   | <0.01   | <0.01   | 0.02   |
| Th MMI-ME mg/kg<br>0.0005  | <b>Tc</b> | 1191 | 46   | 4%  | <0.0005 | 0.0026  | 0.021   | 0.10    | 3.52   |
| Ti MMI-ME mg/kg<br>0.003   | <b>Tc</b> | 1191 | 17   | 1%  | <0.003  | 0.010   | 0.019   | 0.04    | 26.5   |
| Tl MMI-ME mg/kg<br>0.0005  | <b>Tc</b> | 1191 | 805  | 68% | <0.0005 | <0.0005 | <0.0005 | 0.0006  | 0.0191 |
| U MMI-ME mg/kg<br>0.001    | <b>Tc</b> | 1191 | 0    | 0%  | 0.001   | 0.027   | 0.063   | 0.129   | 3.49   |
| V MMI-ME mg/kg<br>0.001    | <b>Tc</b> | 1191 | 0    | 0%  | 0.002   | 0.014   | 0.025   | 0.048   | 2.61   |
| W MMI-ME mg/kg<br>0.001    | <b>Tc</b> | 1191 | 1030 | 86% | <0.001  | <0.001  | <0.001  | <0.001  | 0.059  |
| Y MMI-ME mg/kg<br>0.005    | <b>Tc</b> | 1191 | 26   | 2%  | <0.005  | 0.036   | 0.098   | 0.337   | 4.16   |
| Yb MMI-ME mg/kg<br>0.001   | <b>Tc</b> | 1191 | 101  | 8%  | <0.001  | 0.003   | 0.007   | 0.024   | 1.56   |
| Zn MMI-ME mg/kg<br>0.02    | <b>Tc</b> | 1191 | 18   | 2%  | <0.02   | 0.06    | 0.12    | 0.31    | 19.5   |
| Zr MMI-ME mg/kg<br>0.005   | <b>Tc</b> | 1191 | 250  | 21% | <0.005  | 0.006   | 0.014   | 0.045   | 1.69   |

\*Method: MMI-ME: Mobile Metal Ion®-Multi Element (see Methods for more details)

^LLD: Lower Limit of Detection

#Type: Tc: Top Outlet Sediment coarse (< 2 mm)
