# Supplementary material
Source: publisher figshare collection journal article supplement (https://geolsoc.figshare.com/articles/dataset/_/3454034)
Supplement: Supplementary file 2 [file 1]

EION CAMERON SPECIAL ISSUE OF GEEA MANUSCRIPT  
BY CARITAT & COOPER (DECEMBER 2014)

**Appendix 4.** Summary statistics for bulk properties data from the National Geochemical Survey of Australia (Caritat & Cooper 2011b)

| Element Method*<br>Unit | Typ<br>e# | N    | N<LL<br>D | %<LL<br>D | Min  | 25%  | Med  | 75%  | Max   |
|-------------------------|-----------|------|-----------|-----------|------|------|------|------|-------|
| <b>BULK</b>             |           |      |           |           |      |      |      |      |       |
| Field_pH SP N/A         | <b>Tb</b> | 1192 | N/A       | N/A       | 4.0  | 6.0  | 6.5  | 8.0  | 10.0  |
|                         | <b>Bb</b> | 1192 | N/A       | N/A       | 4.0  | 6.0  | 7.0  | 8.5  | 10.0  |
| pH_1:5 Pot N/A          | <b>Tb</b> | 1191 | N/A       | N/A       | 3.62 | 5.63 | 6.39 | 7.36 | 9.84  |
|                         | <b>Bb</b> | 1191 | N/A       | N/A       | 3.30 | 6.24 | 7.17 | 8.18 | 9.74  |
| EC_1:5 Pot N/A          | <b>Tb</b> | 1191 | N/A       | N/A       | 2.07 | 21.0 | 50.3 | 121  | 37800 |
|                         | <b>Bb</b> | 1191 | N/A       | N/A       | 2.63 | 20.1 | 74.2 | 680  | 22570 |
| Sand LPSA %             | <b>Tb</b> | 1191 | N/A       | N/A       | 5    | 40   | 61   | 82   | 100   |
|                         | <b>Bb</b> | 1190 | N/A       | N/A       | 4    | 40   | 58   | 77   | 100   |
| Silt LPSA %             | <b>Tb</b> | 1191 | N/A       | N/A       | 0    | 13   | 27   | 41   | 75    |
|                         | <b>Bb</b> | 1190 | N/A       | N/A       | 0    | 17   | 29   | 43   | 73    |
| Clay LPSA %             | <b>Tb</b> | 1191 | N/A       | N/A       | 0    | 4    | 10   | 17   | 56    |
|                         | <b>Bb</b> | 1190 | N/A       | N/A       | 0    | 5    | 10   | 17   | 49    |

\*Method: LPSA: Laser Particle Size Analysis; Pot: Potentiometry; SP: Saturated Paste (see Methods for more details)

#Type: Bb: Bottom Outlet Sediment bulk; Tb: Bottom Outlet Sediment bulk
