# Supplementary material
Source: publisher figshare collection journal article supplement (https://geolsoc.figshare.com/articles/dataset/_/3454034)
Supplement: Supplementary file 3 [file 1]

EION CAMERON SPECIAL ISSUE OF GEEA MANUSCRIPT  
BY CARITAT & COOPER (DECEMBER 2014)

Appendix 2. Summary statistics for aqua regia element content data from the National Geochemical Survey of Australia (parameters in italics deemed not fit for purpose) (Caritat & Cooper 2011b)

| Element Method*<br>Unit LLD-ULD^ | Typ<br>e# | N    | N<LL<br>D | %<LL<br>D | Min     | 25%    | Med    | 75%    | Max         |
|----------------------------------|-----------|------|-----------|-----------|---------|--------|--------|--------|-------------|
| <b>AQUA REGIA</b>                |           |      |           |           |         |        |        |        |             |
| <i>Ag AR mg/kg 0.002</i>         | <b>Tc</b> | 1190 | 280       | 24%       | <0.002  | 0.003  | 0.012  | 0.026  | 1.08        |
|                                  | <b>Tf</b> | 1179 | 165       | 14%       | <0.002  | 0.008  | 0.017  | 0.031  | 5.42        |
|                                  | <b>Bc</b> | 1191 | 291       | 24%       | <0.002  | 0.002  | 0.011  | 0.024  | 3.28        |
|                                  | <b>Bf</b> | 1182 | 200       | 17%       | <0.002  | 0.007  | 0.016  | 0.029  | 0.646       |
| <i>Al AR mg/kg 100-100K</i>      | <b>Tc</b> | 1190 | 0         | 0%        | 200     | 5100   | 9700   | 16600  | >10000<br>0 |
|                                  | <b>Tf</b> | 1179 | 2         | 0%        | <100    | 9400   | 14900  | 22050  | 94500       |
|                                  | <b>Bc</b> | 1191 | 1         | 0%        | <100    | 6500   | 11600  | 19000  | >10000<br>0 |
|                                  | <b>Bf</b> | 1182 | 3         | 0%        | <100    | 11600  | 17300  | 25575  | >10000<br>0 |
| <i>As AR mg/kg 0.1</i>           | <b>Tc</b> | 1190 | 46        | 4%        | <0.1    | 0.9    | 1.6    | 2.9    | 133         |
|                                  | <b>Tf</b> | 1179 | 34        | 3%        | <0.1    | 1.1    | 2.1    | 3.5    | 80.1        |
|                                  | <b>Bc</b> | 1191 | 30        | 3%        | <0.1    | 1.1    | 2.0    | 3.5    | 79          |
|                                  | <b>Bf</b> | 1182 | 29        | 2%        | <0.1    | 1.5    | 2.7    | 4.4    | 140         |
| <i>Au AR mg/kg 0.0001</i>        | <b>Tc</b> | 1187 | 216       | 18%       | <0.0001 | 0.0002 | 0.0006 | 0.0012 | 0.152       |
|                                  | <b>Tf</b> | 1175 | 121       | 10%       | <0.0001 | 0.0004 | 0.0008 | 0.0015 | 0.269       |
|                                  | <b>Bc</b> | 1188 | 156       | 13%       | <0.0001 | 0.0003 | 0.0007 | 0.0014 | 0.0662      |
|                                  | <b>Bf</b> | 1177 | 95        | 8%        | <0.0001 | 0.0006 | 0.0011 | 0.0020 | 0.31        |
| <i>B AR mg/kg 1</i>              | <b>Tc</b> | 1190 | 809       | 68%       | <1      | <1     | <1     | 1.0    | 43          |
|                                  | <b>Tf</b> | 1179 | 736       | 62%       | <1      | <1     | <1     | 1.0    | 51          |
|                                  | <b>Bc</b> | 1191 | 742       | 62%       | <1      | <1     | <1     | 2.0    | 49          |
|                                  | <b>Bf</b> | 1182 | 663       | 56%       | <1      | <1     | <1     | 2.0    | 70          |
| <i>Ba AR mg/kg 0.5</i>           | <b>Tc</b> | 1190 | 1         | 0%        | <0.5    | 31.6   | 68.2   | 118.0  | 466         |
|                                  | <b>Tf</b> | 1179 | 2         | 0%        | <0.5    | 54.8   | 88.9   | 134.0  | 619         |
|                                  | <b>Bc</b> | 1191 | 3         | 0%        | <0.5    | 34.6   | 70.3   | 124.5  | 612         |
|                                  | <b>Bf</b> | 1182 | 4         | 0%        | <0.5    | 58.7   | 104.0  | 164.8  | 1490        |
| <i>Be AR mg/kg 0.1</i>           | <b>Tc</b> | 1190 | 73        | 6%        | <0.1    | 0.3    | 0.6    | 0.9    | 11.4        |
|                                  | <b>Tf</b> | 1179 | 26        | 2%        | <0.1    | 0.6    | 0.8    | 1.1    | 18.1        |
|                                  | <b>Bc</b> | 1191 | 50        | 4%        | <0.1    | 0.4    | 0.6    | 1.0    | 3.6         |
|                                  | <b>Bf</b> | 1182 | 23        | 2%        | <0.1    | 0.7    | 0.9    | 1.2    | 10.4        |
| <i>Bi AR mg/kg 0.02</i>          | <b>Tc</b> | 1190 | 42        | 4%        | <0.02   | 0.08   | 0.12   | 0.18   | 29.3        |
|                                  | <b>Tf</b> | 1179 | 11        | 1%        | <0.02   | 0.12   | 0.18   | 0.25   | 39.3        |
|                                  | <b>Bc</b> | 1191 | 39        | 3%        | <0.02   | 0.08   | 0.12   | 0.19   | 3.72        |
|                                  | <b>Bf</b> | 1182 | 8         | 1%        | <0.02   | 0.12   | 0.18   | 0.25   | 8.05        |
| <i>Ca AR mg/kg 100</i>           | <b>Tc</b> | 1190 | 50        | 4%        | <100    | 800    | 2400   | 5000   | 406000      |
|                                  | <b>Tf</b> | 1179 | 18        | 2%        | <100    | 1600   | 3400   | 6450   | 401000      |
|                                  | <b>Bc</b> | 1191 | 56        | 5%        | <100    | 800    | 2800   | 7200   | 383000      |
|                                  | <b>Bf</b> | 1182 | 27        | 2%        | <100    | 1700   | 4400   | 9800   | 386000      |
| <i>Cd AR mg/kg 0.01</i>          | <b>Tc</b> | 1190 | 219       | 18%       | <0.01   | 0.02   | 0.04   | 0.07   | 5.09        |
|                                  | <b>Tf</b> | 1179 | 123       | 10%       | <0.01   | 0.03   | 0.05   | 0.09   | 22.1        |
|                                  | <b>Bc</b> | 1191 | 289       | 24%       | <0.01   | 0.01   | 0.03   | 0.05   | 1.42        |
|                                  | <b>Bf</b> | 1182 | 213       | 18%       | <0.01   | 0.02   | 0.04   | 0.07   | 1.19        |
| <i>Ce AR mg/kg 0.01</i>          | <b>Tc</b> | 1190 | 0         | 0%        | 0.17    | 14.75  | 28.80  | 43.70  | 149         |
|                                  | <b>Tf</b> | 1179 | 0         | 0%        | 0.03    | 31.20  | 42.90  | 56.80  | 395         |
|                                  | <b>Bc</b> | 1191 | 1         | 0%        | <0.01   | 17.10  | 30.20  | 43.60  | 170         |
|                                  | <b>Bf</b> | 1182 | 1         | 0%        | <0.01   | 33.13  | 44.30  | 60.38  | 295         |
| <i>Co AR mg/kg 0.1</i>           | <b>Tc</b> | 1190 | 6         | 1%        | <0.1    | 2.6    | 6.3    | 10.9   | 70.1        |

EION CAMERON SPECIAL ISSUE OF GEEA MANUSCRIPT  
BY CARITAT & COOPER (DECEMBER 2014)

|                  |           |      |      |     |       |       |       |       |        |
|------------------|-----------|------|------|-----|-------|-------|-------|-------|--------|
|                  | <b>Tf</b> | 1179 | 4    | 0%  | <0.1  | 5.4   | 8.5   | 12.1  | 60.1   |
|                  | <b>Bc</b> | 1191 | 8    | 1%  | <0.1  | 3.1   | 6.7   | 10.8  | 141    |
|                  | <b>Bf</b> | 1182 | 5    | 0%  | <0.1  | 6.3   | 9.9   | 14.0  | 70.9   |
| Cr AR mg/kg 0.5  | <b>Tc</b> | 1190 | 2    | 0%  | <0.5  | 15.0  | 23.6  | 37.2  | 1660   |
|                  | <b>Tf</b> | 1179 | 0    | 0%  | 0.9   | 19.6  | 29.4  | 47.5  | 915    |
|                  | <b>Bc</b> | 1191 | 3    | 0%  | <0.5  | 16.6  | 25.7  | 39.7  | 1310   |
|                  | <b>Bf</b> | 1182 | 1    | 0%  | <0.5  | 23.1  | 34.6  | 51.2  | 1580   |
| Cs AR mg/kg 0.02 | <b>Tc</b> | 1190 | 7    | 1%  | <0.02 | 0.42  | 0.80  | 1.39  | 6.24   |
|                  | <b>Tf</b> | 1179 | 5    | 0%  | <0.02 | 0.70  | 1.16  | 1.78  | 7.31   |
|                  | <b>Bc</b> | 1191 | 5    | 0%  | <0.02 | 0.55  | 0.98  | 1.56  | 8.33   |
|                  | <b>Bf</b> | 1182 | 7    | 1%  | <0.02 | 0.88  | 1.43  | 2.09  | 7.48   |
| Cu AR mg/kg 0.01 | <b>Tc</b> | 1190 | 4    | 0%  | <0.01 | 5.52  | 11.30 | 18.00 | 150    |
|                  | <b>Tf</b> | 1179 | 2    | 0%  | <0.01 | 11.00 | 16.50 | 24.15 | 170    |
|                  | <b>Bc</b> | 1191 | 6    | 1%  | <0.01 | 6.26  | 11.80 | 18.35 | 268    |
|                  | <b>Bf</b> | 1182 | 2    | 0%  | <0.01 | 11.90 | 17.70 | 25.50 | 141    |
| Dy AR mg/kg 0.1  | <b>Tc</b> | 1190 | 19   | 2%  | <0.1  | 0.8   | 1.6   | 2.4   | 6.6    |
|                  | <b>Tf</b> | 1179 | 6    | 1%  | <0.1  | 1.8   | 2.4   | 3.0   | 11.1   |
|                  | <b>Bc</b> | 1191 | 20   | 2%  | <0.1  | 0.9   | 1.6   | 2.4   | 7.2    |
|                  | <b>Bf</b> | 1182 | 7    | 1%  | <0.1  | 1.9   | 2.5   | 3.2   | 11.8   |
| Er AR mg/kg 0.1  | <b>Tc</b> | 1190 | 77   | 6%  | <0.1  | 0.3   | 0.7   | 1.1   | 2.9    |
|                  | <b>Tf</b> | 1179 | 18   | 2%  | <0.1  | 0.8   | 1.1   | 1.4   | 3.8    |
|                  | <b>Bc</b> | 1191 | 51   | 4%  | <0.1  | 0.4   | 0.7   | 1.1   | 3      |
|                  | <b>Bf</b> | 1182 | 21   | 2%  | <0.1  | 0.9   | 1.1   | 1.4   | 4.9    |
| Eu AR mg/kg 0.1  | <b>Tc</b> | 1190 | 109  | 9%  | <0.1  | 0.2   | 0.5   | 0.8   | 2.7    |
|                  | <b>Tf</b> | 1179 | 24   | 2%  | <0.1  | 0.6   | 0.8   | 1.0   | 4.3    |
|                  | <b>Bc</b> | 1191 | 78   | 7%  | <0.1  | 0.3   | 0.5   | 0.8   | 2.7    |
|                  | <b>Bf</b> | 1182 | 26   | 2%  | <0.1  | 0.6   | 0.8   | 1.0   | 3.6    |
| Fe AR mg/kg 100  | <b>Tc</b> | 1190 | 1    | 0%  | <100  | 9400  | 16500 | 25775 | 202000 |
|                  | <b>Tf</b> | 1179 | 2    | 0%  | <100  | 16200 | 23200 | 33800 | 175000 |
|                  | <b>Bc</b> | 1191 | 3    | 0%  | <100  | 10800 | 18300 | 27550 | 223000 |
|                  | <b>Bf</b> | 1182 | 3    | 0%  | <100  | 18700 | 26550 | 36500 | 212000 |
| Ga AR mg/kg 0.02 | <b>Tc</b> | 1190 | 2    | 0%  | <0.02 | 1.98  | 3.51  | 5.93  | 22.6   |
|                  | <b>Tf</b> | 1179 | 3    | 0%  | <0.02 | 3.54  | 5.29  | 7.62  | 23.9   |
|                  | <b>Bc</b> | 1191 | 2    | 0%  | <0.02 | 2.45  | 4.34  | 6.59  | 36.6   |
|                  | <b>Bf</b> | 1182 | 3    | 0%  | <0.02 | 4.34  | 6.38  | 8.92  | 35.2   |
| Gd AR mg/kg 0.1  | <b>Tc</b> | 1190 | 12   | 1%  | <0.1  | 1.1   | 2.2   | 3.4   | 9.1    |
|                  | <b>Tf</b> | 1179 | 5    | 0%  | <0.1  | 2.5   | 3.3   | 4.3   | 23.6   |
|                  | <b>Bc</b> | 1191 | 5    | 0%  | <0.1  | 1.2   | 2.3   | 3.4   | 10.4   |
|                  | <b>Bf</b> | 1182 | 7    | 1%  | <0.1  | 2.6   | 3.4   | 4.4   | 16.6   |
| Ge AR mg/kg 0.1  | <b>Tc</b> | 1190 | 1055 | 89% | <0.1  | <0.1  | <0.1  | <0.1  | 0.4    |
|                  | <b>Tf</b> | 1179 | 938  | 80% | <0.1  | <0.1  | <0.1  | <0.1  | 0.3    |
|                  | <b>Bc</b> | 1191 | 1030 | 86% | <0.1  | <0.1  | <0.1  | <0.1  | 0.3    |
|                  | <b>Bf</b> | 1182 | 867  | 73% | <0.1  | <0.1  | <0.1  | 0.1   | 0.3    |
| Hf AR mg/kg 0.1  | <b>Tc</b> | 1190 | 755  | 63% | <0.1  | <0.1  | <0.1  | 0.1   | 1.1    |
|                  | <b>Tf</b> | 1179 | 592  | 50% | <0.1  | <0.1  | <0.1  | 0.2   | 0.8    |
|                  | <b>Bc</b> | 1191 | 588  | 49% | <0.1  | <0.1  | 0.1   | 0.2   | 2.1    |
|                  | <b>Bf</b> | 1182 | 497  | 42% | <0.1  | <0.1  | 0.1   | 0.2   | 2.3    |
| Hg AR mg/kg 0.01 | <b>Tc</b> | 1190 | 434  | 36% | <0.01 | <0.01 | 0.01  | 0.03  | 3.07   |
|                  | <b>Tf</b> | 1179 | 273  | 23% | <0.01 | 0.01  | 0.02  | 0.04  | 5.74   |
|                  | <b>Bc</b> | 1191 | 470  | 39% | <0.01 | <0.01 | 0.01  | 0.02  | 0.26   |
|                  | <b>Bf</b> | 1182 | 334  | 28% | <0.01 | <0.01 | 0.02  | 0.03  | 0.6    |
| Ho AR mg/kg 0.1  | <b>Tc</b> | 1190 | 217  | 18% | <0.1  | 0.1   | 0.3   | 0.4   | 1.1    |
|                  | <b>Tf</b> | 1179 | 41   | 3%  | <0.1  | 0.3   | 0.4   | 0.5   | 1.5    |

EION CAMERON SPECIAL ISSUE OF GEEA MANUSCRIPT  
BY CARITAT & COOPER (DECEMBER 2014)

|                         |           |      |     |     |       |       |       |       |       |
|-------------------------|-----------|------|-----|-----|-------|-------|-------|-------|-------|
|                         | <b>Bc</b> | 1191 | 174 | 15% | <0.1  | 0.2   | 0.3   | 0.4   | 1.3   |
|                         | <b>Bf</b> | 1182 | 40  | 3%  | <0.1  | 0.3   | 0.5   | 0.6   | 2.1   |
| <i>In AR mg/kg 0.02</i> | <b>Tc</b> | 1190 | 763 | 64% | <0.02 | <0.02 | <0.02 | 0.03  | 0.65  |
|                         | <b>Tf</b> | 1179 | 467 | 40% | <0.02 | <0.02 | 0.02  | 0.03  | 0.5   |
|                         | <b>Bc</b> | 1191 | 680 | 57% | <0.02 | <0.02 | <0.02 | 0.03  | 0.22  |
|                         | <b>Bf</b> | 1182 | 376 | 32% | <0.02 | <0.02 | 0.03  | 0.04  | 0.24  |
| <i>K AR mg/kg 100</i>   | <b>Tc</b> | 1190 | 20  | 2%  | <100  | 800   | 1600  | 3100  | 31200 |
|                         | <b>Tf</b> | 1179 | 8   | 1%  | <100  | 1300  | 2400  | 4300  | 21600 |
|                         | <b>Bc</b> | 1191 | 25  | 2%  | <100  | 800   | 1700  | 3100  | 17600 |
|                         | <b>Bf</b> | 1182 | 11  | 1%  | <100  | 1300  | 2500  | 4800  | 26900 |
| <i>La AR mg/kg 0.5</i>  | <b>Tc</b> | 1190 | 6   | 1%  | <0.5  | 7.2   | 13.8  | 20.7  | 112   |
|                         | <b>Tf</b> | 1179 | 5   | 0%  | <0.5  | 15.0  | 20.6  | 27.8  | 226   |
|                         | <b>Bc</b> | 1191 | 4   | 0%  | <0.5  | 8.1   | 14.3  | 21.1  | 74.2  |
|                         | <b>Bf</b> | 1182 | 7   | 1%  | <0.5  | 15.1  | 20.9  | 28.7  | 166   |
| <i>Li AR mg/kg 0.1</i>  | <b>Tc</b> | 1190 | 8   | 1%  | <0.1  | 2.8   | 5.7   | 10.4  | 67.4  |
|                         | <b>Tf</b> | 1179 | 5   | 0%  | <0.1  | 5.3   | 9.0   | 14.6  | 88    |
|                         | <b>Bc</b> | 1191 | 7   | 1%  | <0.1  | 3.5   | 7.0   | 11.7  | 56    |
|                         | <b>Bf</b> | 1182 | 6   | 1%  | <0.1  | 6.4   | 10.9  | 16.5  | 86.5  |
| <i>Lu AR mg/kg 0.1</i>  | <b>Tc</b> | 1190 | 802 | 67% | <0.1  | <0.1  | <0.1  | 0.1   | 0.9   |
|                         | <b>Tf</b> | 1179 | 513 | 44% | <0.1  | <0.1  | 0.1   | 0.1   | 3.7   |
|                         | <b>Bc</b> | 1191 | 785 | 66% | <0.1  | <0.1  | <0.1  | 0.1   | 1.2   |
|                         | <b>Bf</b> | 1182 | 432 | 37% | <0.1  | <0.1  | 0.1   | 0.2   | 0.6   |
| <i>Mg AR mg/kg 100</i>  | <b>Tc</b> | 1190 | 38  | 3%  | <100  | 600   | 1700  | 3600  | 33700 |
|                         | <b>Tf</b> | 1179 | 10  | 1%  | <100  | 1300  | 2600  | 4300  | 45000 |
|                         | <b>Bc</b> | 1191 | 34  | 3%  | <100  | 1000  | 2300  | 4400  | 47300 |
|                         | <b>Bf</b> | 1182 | 14  | 1%  | <100  | 1800  | 3400  | 5875  | 51300 |
| <i>Mn AR mg/kg 1</i>    | <b>Tc</b> | 1190 | 1   | 0%  | <1    | 112   | 279   | 488   | 3740  |
|                         | <b>Tf</b> | 1179 | 2   | 0%  | <1    | 239   | 386   | 582   | 3060  |
|                         | <b>Bc</b> | 1191 | 4   | 0%  | <1    | 92    | 245   | 458   | 4090  |
|                         | <b>Bf</b> | 1182 | 1   | 0%  | <1    | 195   | 379   | 603   | 5380  |
| <i>Mo AR mg/kg 0.01</i> | <b>Tc</b> | 1190 | 69  | 6%  | <0.01 | 0.11  | 0.20  | 0.35  | 18.2  |
|                         | <b>Tf</b> | 1179 | 38  | 3%  | <0.01 | 0.17  | 0.29  | 0.47  | 19.9  |
|                         | <b>Bc</b> | 1191 | 62  | 5%  | <0.01 | 0.13  | 0.23  | 0.41  | 63.7  |
|                         | <b>Bf</b> | 1182 | 29  | 2%  | <0.01 | 0.22  | 0.38  | 0.67  | 11    |
| <i>Na AR mg/kg 10</i>   | <b>Tc</b> | 1190 | 35  | 3%  | <10   | 80    | 180   | 360   | 32500 |
|                         | <b>Tf</b> | 1179 | 17  | 1%  | <10   | 110   | 210   | 475   | 32200 |
|                         | <b>Bc</b> | 1191 | 23  | 2%  | <10   | 120   | 370   | 1545  | 28500 |
|                         | <b>Bf</b> | 1182 | 14  | 1%  | <10   | 160   | 485   | 1968  | 36700 |
| <i>Nb AR mg/kg 0.1</i>  | <b>Tc</b> | 1190 | 392 | 33% | <0.1  | <0.1  | 0.2   | 0.3   | 15.1  |
|                         | <b>Tf</b> | 1179 | 233 | 20% | <0.1  | 0.1   | 0.2   | 0.4   | 17.8  |
|                         | <b>Bc</b> | 1191 | 542 | 46% | <0.1  | <0.1  | 0.1   | 0.2   | 7.5   |
|                         | <b>Bf</b> | 1182 | 365 | 31% | <0.1  | <0.1  | 0.2   | 0.3   | 6.5   |
| <i>Nd AR mg/kg 0.02</i> | <b>Tc</b> | 1190 | 0   | 0%  | 0.04  | 6.35  | 12.50 | 18.40 | 51.4  |
|                         | <b>Tf</b> | 1179 | 1   | 0%  | <0.02 | 14.20 | 18.60 | 23.90 | 152   |
|                         | <b>Bc</b> | 1191 | 1   | 0%  | <0.02 | 7.19  | 13.00 | 18.30 | 54.7  |
|                         | <b>Bf</b> | 1182 | 2   | 0%  | <0.02 | 14.50 | 18.95 | 25.08 | 104   |
| <i>Ni AR mg/kg 0.1</i>  | <b>Tc</b> | 1190 | 7   | 1%  | <0.1  | 4.6   | 9.8   | 16.7  | 387   |
|                         | <b>Tf</b> | 1179 | 5   | 0%  | <0.1  | 8.4   | 13.8  | 21.7  | 404   |
|                         | <b>Bc</b> | 1191 | 4   | 0%  | <0.1  | 5.9   | 11.5  | 18.4  | 458   |
|                         | <b>Bf</b> | 1182 | 2   | 0%  | <0.1  | 10.6  | 16.9  | 24.8  | 554   |
| <i>Pb AR mg/kg 0.01</i> | <b>Tc</b> | 1190 | 2   | 0%  | <0.01 | 3.98  | 7.26  | 11.20 | 1090  |
|                         | <b>Tf</b> | 1179 | 0   | 0%  | 0.01  | 7.12  | 10.50 | 14.00 | 1520  |
|                         | <b>Bc</b> | 1191 | 1   | 0%  | <0.01 | 4.16  | 7.38  | 10.90 | 789   |

EION CAMERON SPECIAL ISSUE OF GEEA MANUSCRIPT  
BY CARITAT & COOPER (DECEMBER 2014)

|                             |           |      |     |     |       |       |       |       |       |
|-----------------------------|-----------|------|-----|-----|-------|-------|-------|-------|-------|
|                             | <b>Bf</b> | 1182 | 1   | 0%  | <0.01 | 7.50  | 10.45 | 14.10 | 146   |
| <i>Pr AR mg/kg 0.1</i>      | <b>Tc</b> | 1190 | 6   | 1%  | <0.1  | 1.7   | 3.3   | 4.8   | 14.5  |
|                             | <b>Tf</b> | 1179 | 5   | 0%  | <0.1  | 3.6   | 4.8   | 6.3   | 45.3  |
|                             | <b>Bc</b> | 1191 | 4   | 0%  | <0.1  | 1.9   | 3.3   | 4.8   | 14.6  |
|                             | <b>Bf</b> | 1182 | 8   | 1%  | <0.1  | 3.8   | 4.9   | 6.6   | 30.1  |
| <i>Rb AR mg/kg 0.1</i>      | <b>Tc</b> | 1190 | 3   | 0%  | <0.1  | 6.6   | 12.6  | 21.1  | 96.4  |
|                             | <b>Tf</b> | 1179 | 3   | 0%  | <0.1  | 11.8  | 18.9  | 29.4  | 109   |
|                             | <b>Bc</b> | 1191 | 5   | 0%  | <0.1  | 8.2   | 13.9  | 22.7  | 88.2  |
|                             | <b>Bf</b> | 1182 | 5   | 0%  | <0.1  | 13.4  | 21.1  | 32.4  | 108   |
| <i>Sb AR mg/kg 0.02</i>     | <b>Tc</b> | 1190 | 79  | 7%  | <0.02 | 0.06  | 0.12  | 0.19  | 18.1  |
|                             | <b>Tf</b> | 1179 | 43  | 4%  | <0.02 | 0.09  | 0.15  | 0.25  | 37.1  |
|                             | <b>Bc</b> | 1191 | 71  | 6%  | <0.02 | 0.07  | 0.13  | 0.21  | 38.9  |
|                             | <b>Bf</b> | 1182 | 31  | 3%  | <0.02 | 0.10  | 0.16  | 0.26  | 54.8  |
| <i>Sc AR mg/kg 0.1</i>      | <b>Tc</b> | 1190 | 22  | 2%  | <0.1  | 1.7   | 3.5   | 6.3   | 27.8  |
|                             | <b>Tf</b> | 1179 | 6   | 1%  | <0.1  | 3.5   | 5.4   | 8.0   | 27    |
|                             | <b>Bc</b> | 1191 | 18  | 2%  | <0.1  | 2.3   | 4.4   | 7.0   | 33    |
|                             | <b>Bf</b> | 1182 | 5   | 0%  | <0.1  | 4.3   | 6.5   | 9.3   | 37.4  |
| <i>Se AR mg/kg 0.01</i>     | <b>Tc</b> | 1191 | 37  | 3%  | <0.01 | 0.03  | 0.06  | 0.12  | 2.01  |
|                             | <b>Tf</b> | 1187 | 19  | 2%  | <0.01 | 0.05  | 0.09  | 0.15  | 2.5   |
|                             | <b>Bc</b> | 1191 | 35  | 3%  | <0.01 | 0.03  | 0.06  | 0.13  | 2.36  |
|                             | <b>Bf</b> | 1186 | 25  | 2%  | <0.01 | 0.05  | 0.09  | 0.17  | 4.36  |
| <i>Sm AR mg/kg 0.1</i>      | <b>Tc</b> | 1190 | 10  | 1%  | <0.1  | 1.2   | 2.6   | 3.8   | 10.3  |
|                             | <b>Tf</b> | 1179 | 6   | 1%  | <0.1  | 2.9   | 3.8   | 4.9   | 27.2  |
|                             | <b>Bc</b> | 1191 | 7   | 1%  | <0.1  | 1.4   | 2.7   | 3.8   | 11.8  |
|                             | <b>Bf</b> | 1182 | 8   | 1%  | <0.1  | 3.0   | 3.9   | 5.1   | 19    |
| <i>Sn AR mg/kg 0.05</i>     | <b>Tc</b> | 1190 | 29  | 2%  | <0.05 | 0.41  | 0.65  | 0.99  | 73.2  |
|                             | <b>Tf</b> | 1179 | 6   | 1%  | <0.05 | 0.69  | 0.96  | 1.31  | 42.5  |
|                             | <b>Bc</b> | 1191 | 18  | 2%  | <0.05 | 0.47  | 0.71  | 1.04  | 67    |
|                             | <b>Bf</b> | 1182 | 1   | 0%  | <0.05 | 0.76  | 1.07  | 1.39  | 20.1  |
| <i>Sr AR mg/kg 0.5-1000</i> | <b>Tc</b> | 1190 | 7   | 1%  | <0.5  | 8.7   | 22.1  | 46.3  | >1000 |
|                             | <b>Tf</b> | 1179 | 6   | 1%  | <0.5  | 17.9  | 31.7  | 60.0  | >1000 |
|                             | <b>Bc</b> | 1191 | 11  | 1%  | <0.5  | 10.5  | 26.2  | 63.0  | >1000 |
|                             | <b>Bf</b> | 1182 | 4   | 0%  | <0.5  | 19.9  | 40.6  | 84.7  | >1000 |
| <i>Tb AR mg/kg 0.1</i>      | <b>Tc</b> | 1190 | 242 | 20% | <0.1  | 0.1   | 0.3   | 0.4   | 1.3   |
|                             | <b>Tf</b> | 1179 | 47  | 4%  | <0.1  | 0.3   | 0.4   | 0.5   | 2.1   |
|                             | <b>Bc</b> | 1191 | 189 | 16% | <0.1  | 0.1   | 0.3   | 0.4   | 1.2   |
|                             | <b>Bf</b> | 1182 | 43  | 4%  | <0.1  | 0.3   | 0.4   | 0.6   | 1.9   |
| <i>Te AR mg/kg 0.02</i>     | <b>Tc</b> | 1190 | 461 | 39% | <0.02 | <0.02 | 0.03  | 0.05  | 0.2   |
|                             | <b>Tf</b> | 1179 | 420 | 36% | <0.02 | <0.02 | 0.03  | 0.05  | 0.26  |
|                             | <b>Bc</b> | 1191 | 451 | 38% | <0.02 | <0.02 | 0.03  | 0.05  | 0.22  |
|                             | <b>Bf</b> | 1182 | 361 | 31% | <0.02 | <0.02 | 0.03  | 0.05  | 0.28  |
| <i>Th AR mg/kg 0.1</i>      | <b>Tc</b> | 1190 | 4   | 0%  | <0.1  | 2.3   | 3.7   | 5.9   | 44.2  |
|                             | <b>Tf</b> | 1179 | 2   | 0%  | <0.1  | 3.8   | 5.8   | 8.6   | 94.1  |
|                             | <b>Bc</b> | 1191 | 2   | 0%  | <0.1  | 2.8   | 4.3   | 6.7   | 41.9  |
|                             | <b>Bf</b> | 1182 | 5   | 0%  | <0.1  | 4.5   | 6.6   | 9.4   | 69.2  |
| <i>Tl AR mg/kg 0.02</i>     | <b>Tc</b> | 1190 | 96  | 8%  | <0.02 | 0.04  | 0.08  | 0.14  | 0.49  |
|                             | <b>Tf</b> | 1179 | 24  | 2%  | <0.02 | 0.08  | 0.12  | 0.18  | 0.46  |
|                             | <b>Bc</b> | 1191 | 59  | 5%  | <0.02 | 0.06  | 0.10  | 0.16  | 0.43  |
|                             | <b>Bf</b> | 1182 | 20  | 2%  | <0.02 | 0.10  | 0.14  | 0.21  | 0.57  |
| <i>Tm AR mg/kg 0.1</i>      | <b>Tc</b> | 1190 | 628 | 53% | <0.1  | <0.1  | <0.1  | 0.2   | 0.5   |
|                             | <b>Tf</b> | 1179 | 284 | 24% | <0.1  | 0.1   | 0.1   | 0.2   | 0.5   |
|                             | <b>Bc</b> | 1191 | 590 | 50% | <0.1  | <0.1  | 0.1   | 0.2   | 0.6   |
|                             | <b>Bf</b> | 1182 | 249 | 21% | <0.1  | 0.1   | 0.2   | 0.2   | 0.7   |

EION CAMERON SPECIAL ISSUE OF GEEA MANUSCRIPT  
BY CARITAT & COOPER (DECEMBER 2014)

|                   |           |      |      |     |       |      |       |       |      |
|-------------------|-----------|------|------|-----|-------|------|-------|-------|------|
| U AR mg/kg 0.1    | <b>Tc</b> | 1190 | 51   | 4%  | <0.1  | 0.3  | 0.5   | 1.0   | 35   |
|                   | <b>Tf</b> | 1179 | 5    | 0%  | <0.1  | 0.5  | 0.8   | 1.6   | 42.6 |
|                   | <b>Bc</b> | 1191 | 34   | 3%  | <0.1  | 0.4  | 0.6   | 1.2   | 16.4 |
|                   | <b>Bf</b> | 1182 | 7    | 1%  | <0.1  | 0.6  | 1.0   | 1.8   | 25.7 |
| V AR mg/kg 1      | <b>Tc</b> | 1190 | 6    | 1%  | <1    | 20   | 33    | 50    | 469  |
|                   | <b>Tf</b> | 1179 | 4    | 0%  | <1    | 32   | 46    | 63    | 184  |
|                   | <b>Bc</b> | 1191 | 6    | 1%  | <1    | 24   | 39    | 56    | 389  |
|                   | <b>Bf</b> | 1182 | 4    | 0%  | <1    | 38   | 54    | 74    | 237  |
| WAR mg/kg 0.1-200 | <b>Tc</b> | 1190 | 1087 | 91% | <0.1  | <0.1 | <0.1  | <0.1  | 174  |
|                   | <b>Tf</b> | 1179 | 1031 | 87% | <0.1  | <0.1 | <0.1  | <0.1  | >200 |
|                   | <b>Bc</b> | 1191 | 1047 | 88% | <0.1  | <0.1 | <0.1  | <0.1  | 10.7 |
|                   | <b>Bf</b> | 1182 | 977  | 83% | <0.1  | <0.1 | <0.1  | <0.1  | 34.2 |
| Y AR mg/kg 0.01   | <b>Tc</b> | 1190 | 0    | 0%  | 0.03  | 3.60 | 7.58  | 12.20 | 31.1 |
|                   | <b>Tf</b> | 1179 | 1    | 0%  | <0.01 | 8.63 | 11.40 | 14.90 | 46.4 |
|                   | <b>Bc</b> | 1191 | 1    | 0%  | <0.01 | 4.27 | 7.91  | 12.00 | 35.1 |
|                   | <b>Bf</b> | 1182 | 1    | 0%  | <0.01 | 9.25 | 12.40 | 15.80 | 57.2 |
| Zn AR mg/kg 0.1   | <b>Tc</b> | 1190 | 44   | 4%  | <0.1  | 13.5 | 26.5  | 43.5  | 262  |
|                   | <b>Tf</b> | 1179 | 13   | 1%  | <0.1  | 22.1 | 37.1  | 54.6  | 8910 |
|                   | <b>Bc</b> | 1191 | 44   | 4%  | <0.1  | 13.7 | 26.4  | 41.6  | 330  |
|                   | <b>Bf</b> | 1182 | 16   | 1%  | <0.1  | 21.4 | 38.1  | 52.6  | 1950 |
| Zr AR mg/kg 0.1   | <b>Tc</b> | 1190 | 7    | 1%  | <0.1  | 1.6  | 3.2   | 6.2   | 53.9 |
|                   | <b>Tf</b> | 1179 | 1    | 0%  | <0.1  | 2.3  | 4.7   | 8.4   | 56.4 |
|                   | <b>Bc</b> | 1191 | 8    | 1%  | <0.1  | 2.5  | 4.7   | 7.8   | 124  |
|                   | <b>Bf</b> | 1182 | 5    | 0%  | <0.1  | 3.2  | 6.1   | 10.0  | 155  |

\*Method: AR: Aqua Regia (see Methods for more details)

^LLD-ULD: Lower Limit of Detection-Upper Limit of Detection (if applicable)

#Type: Bc: Bottom Outlet Sediment coarse (< 2 mm); Bf: Bottom Outlet Sediment fine (< 75 µm); Tc: Top Outlet Sediment coarse (< 2 mm); Tf: Top Outlet Sediment fine (< 75 µm)
