# Supplementary material
Source: publisher figshare collection journal article supplement (https://geolsoc.figshare.com/articles/dataset/_/3454034)
Supplement: Supplementary file 4 [file 1]

EION CAMERON SPECIAL ISSUE OF GEEA MANUSCRIPT  
BY CARITAT & COOPER (DECEMBER 2014)

**Appendix 1.** Summary statistics for total element content data from the National Geochemical Survey of Australia (parameters in italics deemed not fit for purpose) (Caritat & Cooper 2011b)

| Element Method*<br>Unit LLD <sup>^</sup> | Typ<br>e# | N    | N<LL<br>D | %<LL<br>D | Min    | 25%   | Med   | 75%   | Max    |
|------------------------------------------|-----------|------|-----------|-----------|--------|-------|-------|-------|--------|
| <b>TOTAL</b>                             |           |      |           |           |        |       |       |       |        |
| <i>Ag ICP-MS mg/kg<br/>0.03</i>          | <b>Tc</b> | 1190 | 1183      | 99%       | <0.03  | <0.03 | <0.03 | <0.03 | 0.84   |
|                                          | <b>Tf</b> | 1187 | 1165      | 98%       | <0.03  | <0.03 | <0.03 | <0.03 | 1.95   |
|                                          | <b>Bc</b> | 1190 | 1184      | 99%       | <0.03  | <0.03 | <0.03 | <0.03 | 0.71   |
|                                          | <b>Bf</b> | 1190 | 1171      | 98%       | <0.03  | <0.03 | <0.03 | <0.03 | 11.88  |
| <i>Al XRF mg/kg 26</i>                   | <b>Tc</b> | 1190 | 0         | 0%        | 879    | 24219 | 42773 | 58783 | 148336 |
|                                          | <b>Tf</b> | 1187 | 0         | 0%        | 1085   | 46896 | 58308 | 70283 | 137581 |
|                                          | <b>Bc</b> | 1190 | 0         | 0%        | 778    | 30633 | 46920 | 61109 | 194624 |
|                                          | <b>Bf</b> | 1190 | 0         | 0%        | 725    | 51496 | 64850 | 78024 | 188214 |
| <i>As ICP-MS mg/kg 0.4</i>               | <b>Tc</b> | 1190 | 45        | 4%        | <0.4   | 1.8   | 3.1   | 4.7   | 112.7  |
|                                          | <b>Tf</b> | 1187 | 19        | 2%        | <0.4   | 2.7   | 4.1   | 5.8   | 80.3   |
|                                          | <b>Bc</b> | 1190 | 26        | 2%        | <0.4   | 2.1   | 3.6   | 5.3   | 62.2   |
|                                          | <b>Bf</b> | 1190 | 9         | 1%        | <0.4   | 3.2   | 4.9   | 6.9   | 112.6  |
| <i>Au FA mg/kg 0.001</i>                 | <b>Tc</b> | 1186 | 171       | 14%       | <0.001 | 0.001 | 0.001 | 0.002 | 0.087  |
|                                          | <b>Tf</b> | 1137 | 92        | 8%        | <0.001 | 0.001 | 0.002 | 0.002 | 0.175  |
|                                          | <b>Bc</b> | 1189 | 148       | 12%       | <0.001 | 0.001 | 0.001 | 0.002 | 0.109  |
|                                          | <b>Bf</b> | 1124 | 54        | 5%        | <0.001 | 0.001 | 0.002 | 0.003 | 0.116  |
| <i>Ba ICP-MS mg/kg 0.5</i>               | <b>Tc</b> | 1190 | 0         | 0%        | 3.6    | 200   | 315   | 415   | 2577   |
|                                          | <b>Tf</b> | 1187 | 0         | 0%        | 12.2   | 265   | 345   | 430   | 983    |
|                                          | <b>Bc</b> | 1190 | 0         | 0%        | 5.6    | 200   | 326   | 424   | 2374   |
|                                          | <b>Bf</b> | 1190 | 0         | 0%        | 5.6    | 271   | 367   | 461   | 3403   |
| <i>Be ICP-MS mg/kg 1.1</i>               | <b>Tc</b> | 1190 | 516       | 43%       | <1.1   | <1.1  | 1.2   | 1.8   | 18.1   |
|                                          | <b>Tf</b> | 1187 | 237       | 20%       | <1.1   | 1.2   | 1.6   | 2.2   | 26.2   |
|                                          | <b>Bc</b> | 1190 | 462       | 39%       | <1.1   | <1.1  | 1.3   | 1.9   | 7.5    |
|                                          | <b>Bf</b> | 1190 | 174       | 15%       | <1.1   | 1.3   | 1.8   | 2.3   | 11.1   |
| <i>Bi ICP-MS mg/kg<br/>0.02</i>          | <b>Tc</b> | 1190 | 54        | 5%        | <0.02  | 0.11  | 0.18  | 0.28  | 31.90  |
|                                          | <b>Tf</b> | 1187 | 39        | 3%        | <0.02  | 0.19  | 0.28  | 0.37  | 44.77  |
|                                          | <b>Bc</b> | 1190 | 45        | 4%        | <0.02  | 0.12  | 0.19  | 0.28  | 7.90   |
|                                          | <b>Bf</b> | 1190 | 35        | 3%        | <0.02  | 0.20  | 0.28  | 0.38  | 9.65   |
| <i>Ca XRF mg/kg 14</i>                   | <b>Tc</b> | 1190 | 0         | 0%        | 229    | 1379  | 3238  | 6565  | 365619 |
|                                          | <b>Tf</b> | 1187 | 0         | 0%        | 250    | 2487  | 4388  | 8280  | 346830 |
|                                          | <b>Bc</b> | 1190 | 0         | 0%        | 214    | 1587  | 4067  | 9143  | 360102 |
|                                          | <b>Bf</b> | 1190 | 0         | 0%        | 243    | 2646  | 5500  | 11902 | 340283 |
| <i>Cd ICP-MS mg/kg 0.1</i>               | <b>Tc</b> | 1190 | 830       | 70%       | <0.1   | <0.1  | <0.1  | 0.1   | 3.97   |
|                                          | <b>Tf</b> | 1187 | 480       | 40%       | <0.1   | <0.1  | 0.1   | 0.2   | 4.54   |
|                                          | <b>Bc</b> | 1190 | 883       | 74%       | <0.1   | <0.1  | <0.1  | 0.1   | 1.24   |
|                                          | <b>Bf</b> | 1190 | 589       | 49%       | <0.1   | <0.1  | 0.1   | 0.2   | 7.35   |
| <i>Ce ICP-MS mg/kg<br/>0.03</i>          | <b>Tc</b> | 1190 | 0         | 0%        | 0.87   | 23.64 | 42.11 | 57.20 | 252    |
|                                          | <b>Tf</b> | 1187 | 0         | 0%        | 1.03   | 50.76 | 63.60 | 84.08 | 2680   |
|                                          | <b>Bc</b> | 1190 | 0         | 0%        | 1.47   | 24.63 | 41.88 | 57.49 | 180    |
|                                          | <b>Bf</b> | 1190 | 0         | 0%        | 1.24   | 52.40 | 65.73 | 85.69 | 1401   |
| <i>Cl XRF mg/kg 10</i>                   | <b>Tc</b> | 1190 | 11        | 1%        | <10    | 38    | 53    | 92    | 53239  |
|                                          | <b>Tf</b> | 1186 | 6         | 1%        | <10    | 39    | 62    | 116   | 38350  |
|                                          | <b>Bc</b> | 1190 | 3         | 0%        | <10    | 42    | 75    | 576   | 32613  |
|                                          | <b>Bf</b> | 1189 | 8         | 1%        | <10    | 45    | 94    | 800   | 46680  |
| <i>Co ICP-MS mg/kg</i>                   | <b>Tc</b> | 1190 | 2         | 0%        | <0.1   | 3.5   | 8.3   | 13.4  | 74.7   |

EION CAMERON SPECIAL ISSUE OF GEEA MANUSCRIPT  
BY CARITAT & COOPER (DECEMBER 2014)

|                      |           |      |    |    |       |       |       |       |        |
|----------------------|-----------|------|----|----|-------|-------|-------|-------|--------|
| 0.1                  |           |      |    |    |       |       |       |       |        |
|                      | <b>Tf</b> | 1187 | 1  | 0% | <0.1  | 8.0   | 11.3  | 15.5  | 71.9   |
|                      | <b>Bc</b> | 1190 | 3  | 0% | <0.1  | 4.3   | 8.5   | 13.6  | 74.5   |
|                      | <b>Bf</b> | 1190 | 0  | 0% | 0.3   | 9.0   | 12.7  | 17.6  | 83.5   |
| Cr ICP-MS mg/kg 0.5  | <b>Tc</b> | 1190 | 0  | 0% | 4.8   | 32.0  | 47.9  | 65.8  | 2039   |
|                      | <b>Tf</b> | 1187 | 0  | 0% | 4.2   | 52.4  | 65.9  | 90.7  | 1497   |
|                      | <b>Bc</b> | 1190 | 0  | 0% | 4.1   | 34.2  | 49.9  | 68.0  | 7505   |
|                      | <b>Bf</b> | 1190 | 0  | 0% | 3.5   | 57.1  | 69.4  | 94.4  | 7824   |
| Cs ICP-MS mg/kg 0.1  | <b>Tc</b> | 1190 | 9  | 1% | <0.1  | 1.2   | 2.3   | 3.6   | 13.4   |
|                      | <b>Tf</b> | 1187 | 3  | 0% | <0.1  | 2.3   | 3.3   | 4.6   | 13.6   |
|                      | <b>Bc</b> | 1190 | 7  | 1% | <0.1  | 1.5   | 2.5   | 3.8   | 22.7   |
|                      | <b>Bf</b> | 1190 | 2  | 0% | <0.1  | 2.6   | 3.7   | 5.0   | 19.7   |
| Cu ICP-MS mg/kg 0.2  | <b>Tc</b> | 1190 | 14 | 1% | <0.2  | 7.3   | 13.7  | 20.7  | 151    |
|                      | <b>Tf</b> | 1187 | 4  | 0% | <0.2  | 13.7  | 19.3  | 26.3  | 159    |
|                      | <b>Bc</b> | 1190 | 9  | 1% | <0.2  | 8.9   | 14.7  | 21.1  | 81.9   |
|                      | <b>Bf</b> | 1190 | 8  | 1% | <0.2  | 15.2  | 20.6  | 27.6  | 110    |
| Dy ICP-MS mg/kg 0.1  | <b>Tc</b> | 1190 | 1  | 0% | <0.1  | 1.9   | 3.3   | 4.5   | 9.8    |
|                      | <b>Tf</b> | 1187 | 1  | 0% | <0.1  | 4.5   | 5.3   | 6.4   | 101    |
|                      | <b>Bc</b> | 1190 | 0  | 0% | 0.1   | 1.9   | 3.3   | 4.4   | 9.8    |
|                      | <b>Bf</b> | 1190 | 0  | 0% | 0.2   | 4.4   | 5.2   | 6.5   | 44.9   |
| Er ICP-MS mg/kg 0.03 | <b>Tc</b> | 1190 | 1  | 0% | <0.03 | 1.13  | 1.99  | 2.69  | 6.45   |
|                      | <b>Tf</b> | 1187 | 1  | 0% | <0.03 | 2.85  | 3.35  | 4.05  | 49.7   |
|                      | <b>Bc</b> | 1190 | 0  | 0% | 0.07  | 1.14  | 1.97  | 2.64  | 5.87   |
|                      | <b>Bf</b> | 1190 | 0  | 0% | 0.09  | 2.77  | 3.27  | 4.09  | 35.1   |
| Eu ICP-MS mg/kg 0.03 | <b>Tc</b> | 1190 | 13 | 1% | <0.03 | 0.37  | 0.75  | 1.07  | 2.92   |
|                      | <b>Tf</b> | 1187 | 2  | 0% | <0.03 | 0.93  | 1.14  | 1.36  | 29.3   |
|                      | <b>Bc</b> | 1190 | 13 | 1% | <0.03 | 0.41  | 0.75  | 1.07  | 3.17   |
|                      | <b>Bf</b> | 1190 | 1  | 0% | <0.03 | 0.95  | 1.18  | 1.40  | 9.00   |
| F ISE mg/kg 20       | <b>Tc</b> | 1190 | 0  | 0% | 20    | 120   | 200   | 300   | 13250  |
|                      | <b>Tf</b> | 1191 | 0  | 0% | 40    | 180   | 240   | 340   | 3200   |
|                      | <b>Bc</b> | 1188 | 4  | 0% | <20   | 140   | 220   | 320   | 3360   |
|                      | <b>Bf</b> | 1190 | 1  | 0% | <20   | 200   | 280   | 400   | 2900   |
| FeT XRF mg/kg 35     | <b>Tc</b> | 1190 | 0  | 0% | 678   | 14277 | 22539 | 32149 | 229088 |
|                      | <b>Tf</b> | 1187 | 0  | 0% | 574   | 22839 | 30207 | 39474 | 173122 |
|                      | <b>Bc</b> | 1190 | 0  | 0% | 567   | 15695 | 24021 | 32790 | 228571 |
|                      | <b>Bf</b> | 1190 | 0  | 0% | 336   | 25572 | 33068 | 42473 | 229319 |
| Ga ICP-MS mg/kg 0.1  | <b>Tc</b> | 1190 | 3  | 0% | <0.1  | 5.5   | 10.0  | 13.3  | 29.9   |
|                      | <b>Tf</b> | 1187 | 2  | 0% | <0.1  | 10.2  | 13.3  | 16.2  | 29.2   |
|                      | <b>Bc</b> | 1190 | 1  | 0% | <0.1  | 6.8   | 10.6  | 14.1  | 42.8   |
|                      | <b>Bf</b> | 1190 | 1  | 0% | <0.1  | 11.2  | 14.7  | 18.2  | 42.3   |
| Gd ICP-MS mg/kg 0.03 | <b>Tc</b> | 1190 | 0  | 0% | 0.07  | 1.79  | 3.39  | 4.67  | 11.34  |
|                      | <b>Tf</b> | 1187 | 0  | 0% | 0.07  | 4.41  | 5.37  | 6.56  | 135.9  |
|                      | <b>Bc</b> | 1190 | 0  | 0% | 0.13  | 1.88  | 3.38  | 4.70  | 11.29  |
|                      | <b>Bf</b> | 1190 | 0  | 0% | 0.15  | 4.44  | 5.37  | 6.69  | 62.6   |
| Ge ICP-MS mg/kg 0.04 | <b>Tc</b> | 1190 | 20 | 2% | <0.04 | 0.40  | 0.50  | 0.60  | 1.91   |
|                      | <b>Tf</b> | 1187 | 15 | 1% | <0.04 | 0.50  | 0.57  | 0.65  | 2.20   |
|                      | <b>Bc</b> | 1190 | 13 | 1% | <0.04 | 0.40  | 0.50  | 0.60  | 1.60   |
|                      | <b>Bf</b> | 1190 | 20 | 2% | <0.04 | 0.50  | 0.60  | 0.70  | 1.80   |

EION CAMERON SPECIAL ISSUE OF GEEA MANUSCRIPT  
BY CARITAT & COOPER (DECEMBER 2014)

|                         |           |      |     |     |       |       |       |        |        |
|-------------------------|-----------|------|-----|-----|-------|-------|-------|--------|--------|
| Hf ICP-MS mg/kg<br>0.04 | <b>Tc</b> | 1190 | 0   | 0%  | 0.05  | 5.52  | 7.78  | 10.00  | 46.60  |
|                         | <b>Tf</b> | 1187 | 0   | 0%  | 0.06  | 11.73 | 17.89 | 27.92  | 433.5  |
|                         | <b>Bc</b> | 1190 | 0   | 0%  | 0.30  | 5.22  | 7.32  | 9.50   | 46.73  |
|                         | <b>Bf</b> | 1190 | 0   | 0%  | 0.27  | 10.05 | 15.19 | 24.05  | 757.0  |
| Ho ICP-MS mg/kg<br>0.02 | <b>Tc</b> | 1190 | 7   | 1%  | <0.02 | 0.36  | 0.66  | 0.92   | 2.18   |
|                         | <b>Tf</b> | 1187 | 2   | 0%  | <0.02 | 0.94  | 1.12  | 1.36   | 18.83  |
|                         | <b>Bc</b> | 1190 | 6   | 1%  | <0.02 | 0.37  | 0.66  | 0.90   | 2.03   |
|                         | <b>Bf</b> | 1190 | 0   | 0%  | 0.025 | 0.93  | 1.10  | 1.37   | 10.42  |
| K XRF mg/kg 42          | <b>Tc</b> | 1190 | 2   | 0%  | <42   | 5506  | 9879  | 14699  | 36499  |
|                         | <b>Tf</b> | 1187 | 0   | 0%  | 58    | 9090  | 13124 | 16499  | 41621  |
|                         | <b>Bc</b> | 1190 | 2   | 0%  | <42   | 5670  | 10049 | 14407  | 34341  |
|                         | <b>Bf</b> | 1190 | 0   | 0%  | 100   | 9083  | 13004 | 16436  | 43912  |
| La ICP-MS mg/kg 0.1     | <b>Tc</b> | 1190 | 0   | 0%  | 0.43  | 12.1  | 20.9  | 28.2   | 123    |
|                         | <b>Tf</b> | 1187 | 0   | 0%  | 0.54  | 25.5  | 31.9  | 41.8   | 1462   |
|                         | <b>Bc</b> | 1190 | 0   | 0%  | 0.7   | 12.8  | 21.1  | 28.6   | 88.5   |
|                         | <b>Bf</b> | 1190 | 0   | 0%  | 0.57  | 26.0  | 32.5  | 43.1   | 692    |
| LOI Calc mg/kg N/A      | <b>Tc</b> | 1190 | N/A | N/A | 0     | 25387 | 54942 | 90795  | 460484 |
|                         | <b>Tf</b> | 1187 | N/A | N/A | 6429  | 59045 | 85536 | 117095 | 547172 |
|                         | <b>Bc</b> | 1190 | N/A | N/A | 0     | 28465 | 53112 | 86651  | 495322 |
|                         | <b>Bf</b> | 1190 | N/A | N/A | 404   | 61465 | 87438 | 125591 | 547363 |
| Lu ICP-MS mg/kg<br>0.02 | <b>Tc</b> | 1190 | 32  | 3%  | <0.02 | 0.15  | 0.29  | 0.39   | 1.07   |
|                         | <b>Tf</b> | 1187 | 5   | 0%  | <0.02 | 0.43  | 0.54  | 0.68   | 7.73   |
|                         | <b>Bc</b> | 1190 | 34  | 3%  | <0.02 | 0.16  | 0.28  | 0.38   | 0.97   |
|                         | <b>Bf</b> | 1190 | 2   | 0%  | <0.02 | 0.41  | 0.51  | 0.66   | 8.75   |
| Mg XRF mg/kg 60         | <b>Tc</b> | 1190 | 36  | 3%  | <60   | 1037  | 2988  | 5435   | 54053  |
|                         | <b>Tf</b> | 1187 | 5   | 0%  | <60   | 2518  | 4191  | 6919   | 74344  |
|                         | <b>Bc</b> | 1190 | 28  | 2%  | <60   | 1580  | 3672  | 6440   | 74609  |
|                         | <b>Bf</b> | 1190 | 7   | 1%  | <60   | 3150  | 5267  | 8997   | 88430  |
| Mn XRF mg/kg 39         | <b>Tc</b> | 1190 | 62  | 5%  | <39   | 132   | 333   | 565    | 5096   |
|                         | <b>Tf</b> | 1187 | 27  | 2%  | <39   | 310   | 465   | 682    | 2595   |
|                         | <b>Bc</b> | 1190 | 90  | 8%  | <39   | 124   | 294   | 519    | 3423   |
|                         | <b>Bf</b> | 1190 | 39  | 3%  | <39   | 263   | 457   | 682    | 4252   |
| Mo ICP-MS mg/kg<br>0.3  | <b>Tc</b> | 1190 | 211 | 18% | <0.3  | 0.3   | 0.5   | 0.8    | 18.7   |
|                         | <b>Tf</b> | 1187 | 164 | 14% | <0.3  | 0.4   | 0.6   | 1.0    | 21.4   |
|                         | <b>Bc</b> | 1190 | 119 | 10% | <0.3  | 0.4   | 0.6   | 0.9    | 26.9   |
|                         | <b>Bf</b> | 1190 | 77  | 6%  | <0.3  | 0.5   | 0.8   | 1.3    | 18.5   |
| Na XRF mg/kg 74         | <b>Tc</b> | 1190 | 31  | 3%  | <74   | 833   | 2255  | 5132   | 42941  |
|                         | <b>Tf</b> | 1187 | 3   | 0%  | <74   | 1554  | 3405  | 6043   | 32629  |
|                         | <b>Bc</b> | 1190 | 24  | 2%  | <74   | 1187  | 3024  | 5861   | 28200  |
|                         | <b>Bf</b> | 1190 | 3   | 0%  | <74   | 1926  | 4103  | 7137   | 35685  |
| Nb ICP-MS mg/kg<br>0.03 | <b>Tc</b> | 1190 | 2   | 0%  | <0.03 | 5.20  | 8.50  | 11.4   | 64.2   |
|                         | <b>Tf</b> | 1187 | 1   | 0%  | <0.03 | 11.9  | 14.2  | 17.5   | 110    |
|                         | <b>Bc</b> | 1190 | 1   | 0%  | <0.03 | 5.23  | 8.00  | 11.3   | 62.2   |
|                         | <b>Bf</b> | 1190 | 1   | 0%  | <0.03 | 11.5  | 13.8  | 17.1   | 161    |
| Nd ICP-MS mg/kg<br>0.1  | <b>Tc</b> | 1190 | 4   | 0%  | <0.1  | 9.7   | 18.1  | 24.9   | 102    |
|                         | <b>Tf</b> | 1187 | 0   | 0%  | 0.98  | 22.7  | 28.1  | 35.5   | 1110   |
|                         | <b>Bc</b> | 1190 | 2   | 0%  | <0.1  | 10.4  | 18.3  | 25.1   | 73.3   |
|                         | <b>Bf</b> | 1190 | 0   | 0%  | 0.72  | 22.8  | 28.6  | 36.5   | 587    |

EION CAMERON SPECIAL ISSUE OF GEEA MANUSCRIPT  
BY CARITAT & COOPER (DECEMBER 2014)

|                      |           |      |     |     |         |         |         |        |        |
|----------------------|-----------|------|-----|-----|---------|---------|---------|--------|--------|
| Ni ICP-MS mg/kg 0.5  | <b>Tc</b> | 1190 | 4   | 0%  | <0.5    | 9.5     | 15.3    | 22.3   | 227    |
|                      | <b>Tf</b> | 1187 | 4   | 0%  | <0.5    | 14.5    | 20.0    | 28.7   | 424    |
|                      | <b>Bc</b> | 1190 | 4   | 0%  | <0.5    | 11.3    | 17.0    | 23.9   | 605    |
|                      | <b>Bf</b> | 1190 | 4   | 0%  | <0.5    | 16.9    | 22.9    | 32.4   | 748    |
| P XRF mg/kg 22       | <b>Tc</b> | 1190 | 0   | 0%  | 52      | 161     | 266     | 410    | 2444   |
|                      | <b>Tf</b> | 1187 | 0   | 0%  | 57      | 275     | 380     | 519    | 2579   |
|                      | <b>Bc</b> | 1190 | 0   | 0%  | 48      | 140     | 209     | 323    | 1859   |
|                      | <b>Bf</b> | 1190 | 0   | 0%  | 57      | 218     | 305     | 423    | 1772   |
| Pb ICP-MS mg/kg 0.1  | <b>Tc</b> | 1190 | 0   | 0%  | 0.5     | 8.4     | 12.9    | 17.4   | 1530   |
|                      | <b>Tf</b> | 1187 | 0   | 0%  | 0.7     | 13.5    | 17.0    | 21.2   | 1444   |
|                      | <b>Bc</b> | 1190 | 0   | 0%  | 0.5     | 8.9     | 13.1    | 16.9   | 153    |
|                      | <b>Bf</b> | 1190 | 0   | 0%  | 0.3     | 13.9    | 16.9    | 21.3   | 248    |
| Pd FA mg/kg 0.001    | <b>Tc</b> | 1186 | 819 | 69% | <0.001  | <0.001  | <0.001  | 0.001  | 0.013  |
|                      | <b>Tf</b> | 1137 | 547 | 48% | <0.001  | <0.001  | 0.001   | 0.001  | 0.018  |
|                      | <b>Bc</b> | 1189 | 715 | 60% | <0.001  | <0.001  | <0.001  | 0.001  | 0.015  |
|                      | <b>Bf</b> | 1124 | 389 | 35% | <0.001  | <0.001  | 0.001   | 0.001  | 0.015  |
| Pr ICP-MS mg/kg 0.02 | <b>Tc</b> | 1190 | 0   | 0%  | 0.10    | 2.63    | 4.71    | 6.37   | 28.0   |
|                      | <b>Tf</b> | 1187 | 0   | 0%  | 0.11    | 5.83    | 7.27    | 9.28   | 302    |
|                      | <b>Bc</b> | 1190 | 0   | 0%  | 0.19    | 2.77    | 4.77    | 6.44   | 20.0   |
|                      | <b>Bf</b> | 1190 | 0   | 0%  | 0.14    | 5.89    | 7.32    | 9.58   | 161    |
| Pt FA mg/kg 0.0005   | <b>Tc</b> | 1186 | 802 | 68% | <0.0005 | <0.0005 | <0.0005 | 0.0005 | 0.0075 |
|                      | <b>Tf</b> | 1137 | 543 | 48% | <0.0005 | <0.0005 | 0.0005  | 0.0007 | 0.0076 |
|                      | <b>Bc</b> | 1189 | 720 | 61% | <0.0005 | <0.0005 | <0.0005 | 0.0006 | 0.0120 |
|                      | <b>Bf</b> | 1124 | 418 | 37% | <0.0005 | <0.0005 | 0.0005  | 0.0008 | 0.0103 |
| Rb ICP-MS mg/kg 0.2  | <b>Tc</b> | 1190 | 3   | 0%  | <0.2    | 30.3    | 51.2    | 77.7   | 269    |
|                      | <b>Tf</b> | 1187 | 1   | 0%  | <0.2    | 49.7    | 69.4    | 93.3   | 267    |
|                      | <b>Bc</b> | 1190 | 4   | 0%  | <0.2    | 33.2    | 52.5    | 80.9   | 249    |
|                      | <b>Bf</b> | 1190 | 1   | 0%  | <0.2    | 51.7    | 72.0    | 98.1   | 299    |
| S XRF mg/kg 10       | <b>Tc</b> | 1190 | 0   | 0%  | 19      | 91      | 150     | 263    | 151475 |
|                      | <b>Tf</b> | 1186 | 0   | 0%  | 40      | 126     | 199     | 365    | 140452 |
|                      | <b>Bc</b> | 1190 | 1   | 0%  | <10     | 74      | 134     | 282    | 129638 |
|                      | <b>Bf</b> | 1189 | 0   | 0%  | 27      | 112     | 185     | 425    | 141889 |
| Sb ICP-MS mg/kg 0.4  | <b>Tc</b> | 1190 | 848 | 71% | <0.4    | <0.4    | <0.4    | 0.9    | 14.5   |
|                      | <b>Tf</b> | 1187 | 720 | 61% | <0.4    | <0.4    | <0.4    | 1.0    | 28.9   |
|                      | <b>Bc</b> | 1190 | 856 | 72% | <0.4    | <0.4    | <0.4    | 0.9    | 21.4   |
|                      | <b>Bf</b> | 1190 | 717 | 60% | <0.4    | <0.4    | <0.4    | 1.0    | 27.6   |
| Sc ICP-MS mg/kg 0.3  | <b>Tc</b> | 1190 | 5   | 0%  | <0.3    | 4.4     | 7.6     | 10.6   | 30.6   |
|                      | <b>Tf</b> | 1187 | 1   | 0%  | <0.3    | 10.4    | 12.5    | 14.8   | 94.6   |
|                      | <b>Bc</b> | 1190 | 2   | 0%  | <0.3    | 5.0     | 7.9     | 10.7   | 33.6   |
|                      | <b>Bf</b> | 1190 | 1   | 0%  | <0.3    | 11.0    | 13.0    | 15.3   | 180    |
| Si XRF mg/kg 47      | <b>Tc</b> | 1190 | 0   | 0%  | 3506    | 323391  | 362299  | 408829 | 462661 |
|                      | <b>Tf</b> | 1187 | 0   | 0%  | 4552    | 289566  | 324876  | 353986 | 453556 |
|                      | <b>Bc</b> | 1190 | 0   | 0%  | 8296    | 321725  | 357612  | 394216 | 461413 |
|                      | <b>Bf</b> | 1190 | 0   | 0%  | 6464    | 268328  | 312539  | 344691 | 453228 |
| Sm ICP-MS mg/kg 0.04 | <b>Tc</b> | 1190 | 53  | 4%  | <0.04   | 1.90    | 3.75    | 5.30   | 19.6   |
|                      | <b>Tf</b> | 1187 | 4   | 0%  | <0.04   | 4.87    | 6.09    | 7.58   | 206    |
|                      | <b>Bc</b> | 1190 | 41  | 3%  | <0.04   | 2.09    | 3.83    | 5.38   | 13.9   |
|                      | <b>Bf</b> | 1190 | 5   | 0%  | <0.04   | 4.91    | 6.15    | 7.74   | 113    |
| Sn ICP-MS mg/kg 0.2  | <b>Tc</b> | 1190 | 43  | 4%  | <0.2    | 0.7     | 1.3     | 1.9    | 406    |
|                      | <b>Tf</b> | 1187 | 9   | 1%  | <0.2    | 1.6     | 2.0     | 2.6    | 533    |
|                      | <b>Bc</b> | 1190 | 27  | 2%  | <0.2    | 0.9     | 1.3     | 1.9    | 85.0   |

EION CAMERON SPECIAL ISSUE OF GEEA MANUSCRIPT  
BY CARITAT & COOPER (DECEMBER 2014)

|                      |           |      |    |    |       |      |      |      |       |
|----------------------|-----------|------|----|----|-------|------|------|------|-------|
|                      | <b>Bf</b> | 1190 | 8  | 1% | <0.2  | 1.6  | 2.1  | 2.8  | 181   |
| Sr ICP-MS mg/kg 0.2  | <b>Tc</b> | 1190 | 0  | 0% | 1.1   | 38.7 | 68.4 | 114  | 6459  |
|                      | <b>Tf</b> | 1187 | 0  | 0% | 2.5   | 60.5 | 91.4 | 141  | 15840 |
|                      | <b>Bc</b> | 1190 | 1  | 0% | <0.2  | 42.7 | 76.2 | 134  | 5444  |
|                      | <b>Bf</b> | 1190 | 0  | 0% | 1.9   | 64.4 | 102  | 169  | 5803  |
| Ta ICP-MS mg/kg 0.02 | <b>Tc</b> | 1190 | 12 | 1% | <0.02 | 0.40 | 0.67 | 0.95 | 3.4   |
|                      | <b>Tf</b> | 1187 | 5  | 0% | <0.02 | 0.88 | 1.15 | 1.51 | 9.36  |
|                      | <b>Bc</b> | 1190 | 13 | 1% | <0.02 | 0.40 | 0.64 | 0.95 | 3.42  |
|                      | <b>Bf</b> | 1190 | 4  | 0% | <0.02 | 0.85 | 1.10 | 1.45 | 11.6  |
| Tb ICP-MS mg/kg 0.02 | <b>Tc</b> | 1190 | 29 | 2% | <0.02 | 0.28 | 0.55 | 0.79 | 1.78  |
|                      | <b>Tf</b> | 1187 | 1  | 0% | <0.02 | 0.76 | 0.94 | 1.13 | 21.0  |
|                      | <b>Bc</b> | 1190 | 19 | 2% | <0.02 | 0.29 | 0.56 | 0.77 | 2.11  |
|                      | <b>Bf</b> | 1190 | 2  | 0% | <0.02 | 0.75 | 0.92 | 1.16 | 7.81  |
| Th ICP-MS mg/kg 0.02 | <b>Tc</b> | 1190 | 0  | 0% | 0.18  | 5.47 | 7.89 | 11.2 | 84.2  |
|                      | <b>Tf</b> | 1187 | 0  | 0% | 0.21  | 10.3 | 13.6 | 19.3 | 463   |
|                      | <b>Bc</b> | 1190 | 0  | 0% | 0.13  | 5.75 | 8.08 | 11.5 | 59.1  |
|                      | <b>Bf</b> | 1190 | 0  | 0% | 0.20  | 10.1 | 13.6 | 18.9 | 490   |
| Ti XRF mg/kg 30      | <b>Tc</b> | 1190 | 0  | 0% | 108   | 2035 | 3497 | 4782 | 30690 |
|                      | <b>Tf</b> | 1187 | 0  | 0% | 108   | 4845 | 5651 | 6670 | 42406 |
|                      | <b>Bc</b> | 1190 | 0  | 0% | 90    | 2110 | 3410 | 4704 | 30175 |
|                      | <b>Bf</b> | 1190 | 0  | 0% | 78    | 4782 | 5526 | 6486 | 75458 |
| U ICP-MS mg/kg 0.02  | <b>Tc</b> | 1190 | 0  | 0% | 0.12  | 1.15 | 1.75 | 2.51 | 37.4  |
|                      | <b>Tf</b> | 1187 | 0  | 0% | 0.18  | 2.38 | 3.15 | 4.71 | 79.3  |
|                      | <b>Bc</b> | 1190 | 0  | 0% | 0.20  | 1.23 | 1.83 | 2.58 | 18.6  |
|                      | <b>Bf</b> | 1190 | 0  | 0% | 0.17  | 2.34 | 3.17 | 4.83 | 42.3  |
| V ICP-MS mg/kg 0.1   | <b>Tc</b> | 1190 | 1  | 0% | <0.1  | 31.4 | 55.2 | 83.0 | 586   |
|                      | <b>Tf</b> | 1187 | 0  | 0% | 0.9   | 61.8 | 81.7 | 102  | 287   |
|                      | <b>Bc</b> | 1190 | 1  | 0% | <0.1  | 37.1 | 61.5 | 87.8 | 529   |
|                      | <b>Bf</b> | 1190 | 1  | 0% | <0.1  | 70.2 | 90.8 | 112  | 511   |
| W ICP-MS mg/kg 0.1   | <b>Tc</b> | 1190 | 53 | 4% | <0.1  | 0.6  | 1.0  | 1.5  | 327   |
|                      | <b>Tf</b> | 1187 | 10 | 1% | <0.1  | 1.3  | 1.6  | 2.1  | 643   |
|                      | <b>Bc</b> | 1190 | 56 | 5% | <0.1  | 0.6  | 1.0  | 1.5  | 33.7  |
|                      | <b>Bf</b> | 1190 | 10 | 1% | <0.1  | 1.3  | 1.7  | 2.2  | 103   |
| Y ICP-MS mg/kg 0.05  | <b>Tc</b> | 1190 | 0  | 0% | 0.70  | 12.2 | 21.1 | 29.0 | 66.7  |
|                      | <b>Tf</b> | 1187 | 0  | 0% | 0.70  | 29.6 | 35.4 | 42.8 | 584   |
|                      | <b>Bc</b> | 1190 | 0  | 0% | 1.30  | 12.4 | 20.8 | 28.4 | 64.9  |
|                      | <b>Bf</b> | 1190 | 0  | 0% | 1.50  | 28.9 | 34.2 | 42.7 | 349   |
| Yb ICP-MS mg/kg 0.04 | <b>Tc</b> | 1190 | 1  | 0% | <0.04 | 1.26 | 2.11 | 2.78 | 7.23  |
|                      | <b>Tf</b> | 1187 | 0  | 0% | 0.04  | 3.09 | 3.70 | 4.55 | 50.7  |
|                      | <b>Bc</b> | 1190 | 0  | 0% | 0.05  | 1.26 | 2.06 | 2.75 | 6.42  |
|                      | <b>Bf</b> | 1190 | 0  | 0% | 0.07  | 2.96 | 3.56 | 4.46 | 49.3  |
| Zn ICP-MS mg/kg 0.9  | <b>Tc</b> | 1190 | 24 | 2% | <0.9  | 13.4 | 31.4 | 52.4 | 210   |
|                      | <b>Tf</b> | 1187 | 5  | 0% | <0.9  | 31.9 | 49.2 | 67.3 | 289   |
|                      | <b>Bc</b> | 1190 | 29 | 2% | <0.9  | 14.8 | 30.9 | 50.3 | 216   |
|                      | <b>Bf</b> | 1190 | 6  | 1% | <0.9  | 31.6 | 49.3 | 67.2 | 191   |
| Zr ICP-MS mg/kg 0.2  | <b>Tc</b> | 1190 | 0  | 0% | 4.1   | 214  | 304  | 393  | 1778  |
|                      | <b>Tf</b> | 1187 | 0  | 0% | 4.5   | 458  | 710  | 1115 | 17288 |
|                      | <b>Bc</b> | 1190 | 0  | 0% | 19.7  | 200  | 283  | 372  | 1889  |

EION CAMERON SPECIAL ISSUE OF GEEA MANUSCRIPT  
BY CARITAT & COOPER (DECEMBER 2014)

|  |           |      |   |    |      |     |     |     |       |
|--|-----------|------|---|----|------|-----|-----|-----|-------|
|  | <b>Bf</b> | 1190 | 0 | 0% | 17.8 | 386 | 595 | 950 | 31518 |
|--|-----------|------|---|----|------|-----|-----|-----|-------|

\*Method: Calc: Calculated (and verified by Gravimetry); FA: Fire Assay; ICP-MS: Inductively Coupled Plasma-Mass Spectrometry; ISE: Ion Selective Electrode; XRF: X-Ray Fluorescence (see Methods for more details)

^LLD: Lower Limit of Detection

#Type: Bc: Bottom Outlet Sediment coarse (< 2 mm); Bf: Bottom Outlet Sediment fine (< 75 µm); Tc: Top Outlet Sediment coarse (< 2 mm); Tf: Top Outlet Sediment fine (< 75 µm)
